# Supplementary material
Source: publisher figshare collection journal article supplement (https://acs.figshare.com/ndownloader/files/9727381)
Supplement: Supplementary file 1 [file 9727381]

## **Supporting Information for**

### **Rapid Synthesis of Nanoporous Conformal Coatings via Plasma-Enhanced Sequential Infiltration of a Polymer Template.**

Yunlong She<sup>1</sup>, Jihyung Lee<sup>1</sup>, Benjamin T. Diroll<sup>2</sup>, Byeongdu Lee<sup>3</sup>, Samir Aouadi<sup>1</sup>, Elena V. Shevchenko<sup>2,\*</sup>, Diana Berman<sup>1,\*</sup>

<sup>1</sup>Materials Science and Engineering Department, University of North Texas, Denton, TX, 76203, USA

<sup>2</sup>Center for Nanoscale Materials, Argonne National Laboratory, Argonne, IL, 60439, USA

<sup>3</sup>Advanced Photon Source, Argonne National Laboratory, Argonne, IL, 60439, USA

**Corresponding authors:** Diana Berman (Diana.Berman@unt.edu), Elena Shevchenko (eshevchenko@anl.gov).

## CONTENT

**Figure S1:** Rupture of aluminum oxide films during oxygen plasma assisted (20 minutes) polymer removal.

**Figure S2:** Dependence of the porosity of synthesized metal oxide films on the polar/nonpolar domain concentration ratio in the swelled PS-b-P4VP polymer.

**Figure S3:** GISAXS data linecut for 1 PE SIS deposited aluminum oxide in non-swelled PS-b-p4VP polymer.

**Supplementary Note 1:** GISAXS data analysis.

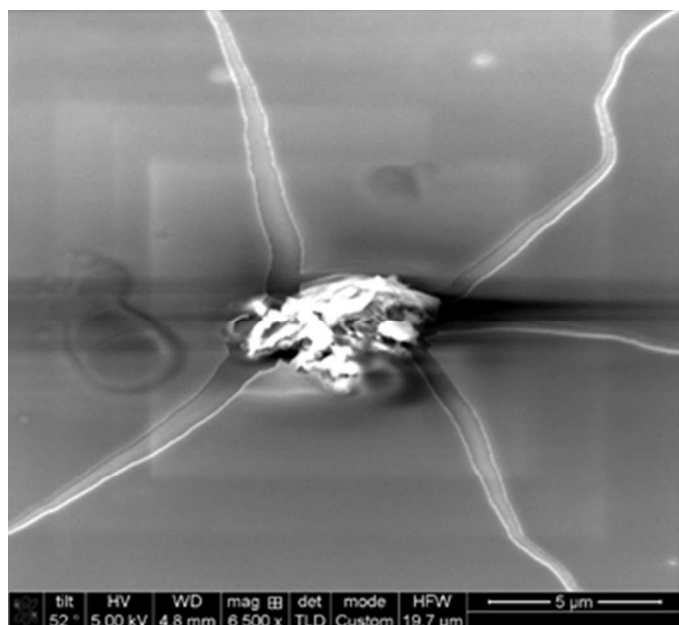

Figure S1. Rupture of aluminum oxide films during oxygen plasma assisted (20 minutes) polymer removal. The figure demonstrates damage to the coating made of aluminum oxide-infiltrated PS-*b*-P4VP polymer.

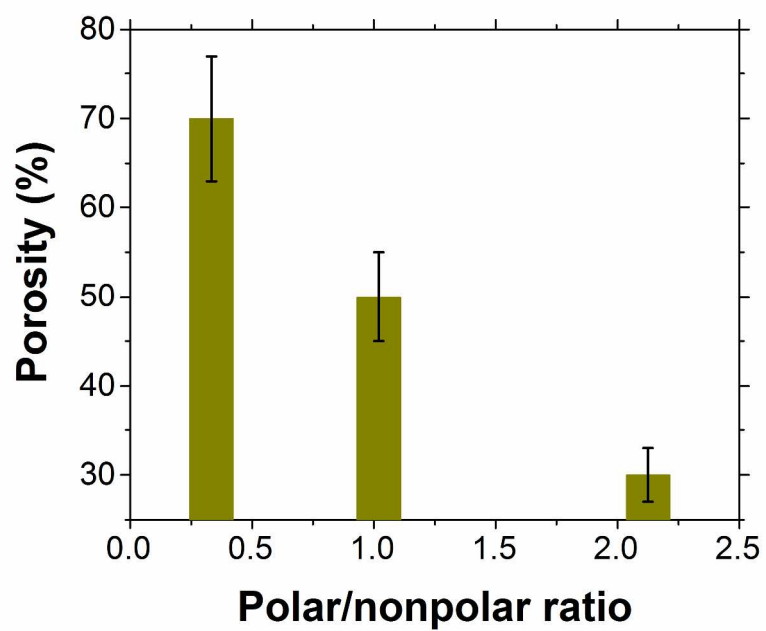

Figure S2. Dependence of the porosity of synthesized metal oxide films on the polar/nonpolar domain concentration ratio in the swelled PS-*b*-P4VP polymer.

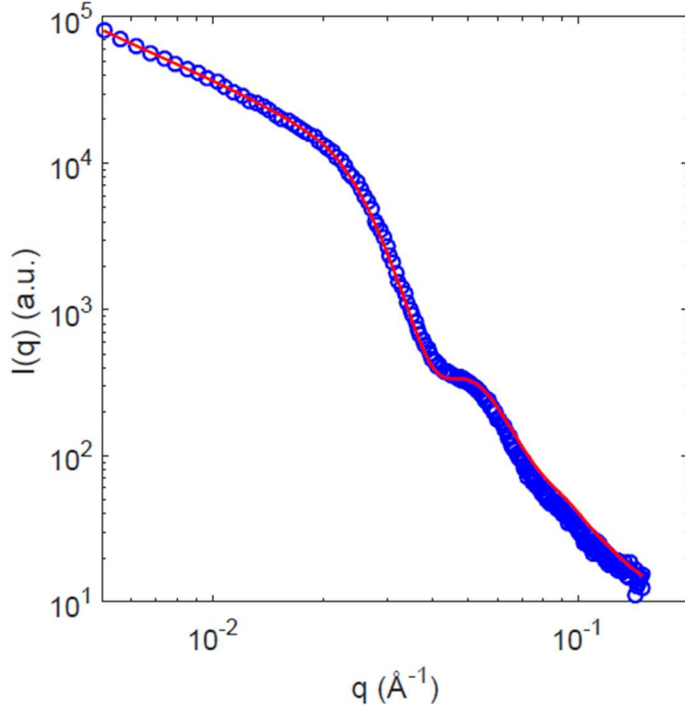

Figure S3. GISAXS data linecut for 1 PE SIS deposited aluminum oxide in non-swelled PS-*b*-p4VP polymer.

### Supplementary Note 1: GISAXS data analysis.

Horizontal cut of GISAXS data can be fit with a vertically oriented cylinder model.

$$F(q_{xy}, R) = 2\pi R^2 \frac{J_0(q_{xy}R)}{q_{xy}R}$$

$$I(q_{xy}) = S(q_{xy}) \int n(r; r_0, \sigma) |F(q_{xy}, r)|^2 dr + Bg$$

$$S(q_{xy}) = S_0(q_{xy}; D, v) + kq^{-n}$$

$S(q_{xy}; D, v)$  is the structure factor in the in-plane, which is composed of  $S_0$  and a power-law type of scattering with an exponent  $n$ . The latter is to describe possible clustering of cylinders. For the former, we used the hard sphere structure factor that is described by two parameters,  $D$  and  $v$ , which are a hydrodynamic radius and volume fraction. The hydrodynamic radius is about the half of the inter-cylinder distance.  $n(r)$  is the Schultz size distribution function, which also has two parameters, mean radius  $r_0$  and variance  $\sigma$ .  $J_0$  is the Bessel function of the first kind of order 0.  $Bg$  stands for background scattering.

We obtained  $r_0=9.2$  nm,  $\sigma=17.4\%$ ,  $D=12.86$  nm,  $\nu=0.158$  and  $n=0.83$ .
